# Supplementary material for: Bioinformatical parsing of folding-on-binding proteins reveals their compositional and evolutionary sequence design
Source: PubMed Central journal article supplement (PMC4683461; doi:10.1038/srep18586), 2015-12-18
Supplement: srep18586-s1.pdf [file srep18586-s1.pdf]

**Bioinformatical parsing of folding-on-binding proteins reveals their compositional and evolutionary sequence design**

**Mohanalakshmi Narasumani<sup>1</sup> and Paul M Harrison<sup>1</sup> \***

<sup>1</sup>Department of Biology, McGill University, Montreal, QC, Canada.

**Supplementary Table1. List of human proteins with FB regions retrieved from IDEAL database**

| IDEAL ID <sup>1</sup> | UniProt Entry <sup>2</sup> | Protein names <sup>3</sup>                                                                                                                                                                                                                                                | Length <sup>4</sup> |
|-----------------------|----------------------------|---------------------------------------------------------------------------------------------------------------------------------------------------------------------------------------------------------------------------------------------------------------------------|---------------------|
| IID00001              | O00482                     | Nuclear receptor subfamily 5 group A member 2 (Alpha-1-fetoprotein transcription factor) (B1-binding factor) (hB1F) (CYP7A promoter-binding factor) (Hepatocytic transcription factor) (Liver receptor homolog 1) (LRH-1)                                                 | 541                 |
| IID00232              | O00571                     | ATP-dependent RNA helicase DDX3X (EC 3.6.4.13) (DEAD box protein 3, X-chromosomal) (DEAD box, X isoform) (Helicase-like protein 2) (HLP2)                                                                                                                                 | 662                 |
| IID00134              | O14745                     | Na(+)/H(+) exchange regulatory cofactor NHE-RF1 (NHERF-1) (Ezrin-radixin-moesin-binding phosphoprotein 50) (EBP50) (Regulatory cofactor of Na(+)/H(+) exchanger) (Sodium-hydrogen exchanger regulatory factor 1) (Solute carrier family 9 isoform A3 regulatory factor 1) | 358                 |
| IID00006              | O15162                     | Phospholipid scramblase 1 (PL scramblase 1) (Ca(2+)-dependent phospholipid scramblase 1) (Erythrocyte phospholipid scramblase) (MmTRA1b)                                                                                                                                  | 318                 |
| IID00007              | O15169                     | Axin-1 (Axis inhibition protein 1) (hAxin)                                                                                                                                                                                                                                | 862                 |
| IID00185              | O15234                     | Protein CASC3 (Cancer susceptibility candidate gene 3 protein) (Metastatic lymph node gene 51 protein) (MLN 51) (Protein barentsz) (Btz)                                                                                                                                  | 703                 |
| IID00189              | O75376                     | Nuclear receptor corepressor 1 (N-CoR) (N-CoR1)                                                                                                                                                                                                                           | 2440                |
| IID00115              | O95149                     | Snurportin-1 (RNA U transporter 1)                                                                                                                                                                                                                                        | 360                 |
| IID00112              | O95405                     | Zinc finger FYVE domain-containing protein 9 (Mothers against decapentaplegic homolog-interacting protein) (Madh-interacting protein) (Novel serine protease) (NSP) (Receptor activation anchor) (hSARA) (Smad anchor for receptor activation)                            | 1425                |
| IID00011              | O95718                     | Steroid hormone receptor ERR2 (ERR beta-2) (Estrogen receptor-like 2) (Estrogen-related receptor                                                                                                                                                                          | 508                 |

|          |        |                                                                                                                                                                                                                                                                                                                                                                                                                                                                                                   |      |
|----------|--------|---------------------------------------------------------------------------------------------------------------------------------------------------------------------------------------------------------------------------------------------------------------------------------------------------------------------------------------------------------------------------------------------------------------------------------------------------------------------------------------------------|------|
|          |        | beta) (ERR-beta) (Nuclear receptor subfamily 3 group B member 2)                                                                                                                                                                                                                                                                                                                                                                                                                                  |      |
| IID00262 | P00533 | Epidermal growth factor receptor (EC 2.7.10.1) (Proto-oncogene c-ErbB-1) (Receptor tyrosine-protein kinase erbB-1)                                                                                                                                                                                                                                                                                                                                                                                | 1210 |
| IID00012 | P01106 | Myc proto-oncogene protein (Class E basic helix-loop-helix protein 39) (bHLHe39) (Proto-oncogene c-Myc) (Transcription factor p64)                                                                                                                                                                                                                                                                                                                                                                | 439  |
| IID00013 | P03372 | Estrogen receptor (ER) (ER-alpha) (Estradiol receptor) (Nuclear receptor subfamily 3 group A member 1)                                                                                                                                                                                                                                                                                                                                                                                            | 595  |
| IID00137 | P04083 | Annexin A1 (Annexin I) (Annexin-1) (Calpactin II) (Calpactin-2) (Chromobindin-9) (Lipocortin I) (Phospholipase A2 inhibitory protein) (p35)                                                                                                                                                                                                                                                                                                                                                       | 346  |
| IID00015 | P04637 | Cellular tumor antigen p53 (Antigen NY-CO-13) (Phosphoprotein p53) (Tumor suppressor p53)                                                                                                                                                                                                                                                                                                                                                                                                         | 393  |
| IID00017 | P06400 | Retinoblastoma-associated protein (p105-Rb) (pRb) (Rb) (pp110)                                                                                                                                                                                                                                                                                                                                                                                                                                    | 928  |
| IID00119 | P09651 | Heterogeneous nuclear ribonucleoprotein A1 (hnRNP A1) (Helix-destabilizing protein) (Single-strand RNA-binding protein) (hnRNP core protein A1) [Cleaved into: Heterogeneous nuclear ribonucleoprotein A1, N-terminally processed]                                                                                                                                                                                                                                                                | 372  |
| IID00194 | P12272 | Parathyroid hormone-related protein (PTH-rP) (PTHrP) (Parathyroid hormone-like protein) (PLP) [Cleaved into: PTHrP[1-36]; PTHrP[38-94]; Osteostatin (PTHrP[107-139])]                                                                                                                                                                                                                                                                                                                             | 177  |
| IID00023 | P12956 | X-ray repair cross-complementing protein 6 (EC 3.6.4.-) (EC 4.2.99.-) (5'-deoxyribose-5-phosphate lyase Ku70) (5'-dRP lyase Ku70) (70 kDa subunit of Ku antigen) (ATP-dependent DNA helicase 2 subunit 1) (ATP-dependent DNA helicase II 70 kDa subunit) (CTC box-binding factor 75 kDa subunit) (CTC75) (CTCBF) (DNA repair protein XRCC6) (Lupus Ku autoantigen protein p70) (Ku70) (Thyroid-lupus autoantigen) (TLAA) (X-ray repair complementing defective repair in Chinese hamster cells 6) | 609  |
| IID00024 | P13010 | X-ray repair cross-complementing protein 5 (EC 3.6.4.-) (86 kDa subunit of Ku antigen) (ATP-dependent DNA helicase 2 subunit 2) (ATP-dependent DNA helicase II 80 kDa subunit) (CTC box-binding factor 85 kDa subunit) (CTC85) (CTCBF) (DNA repair protein XRCC5) (Ku80) (Ku86) (Lupus Ku autoantigen protein p86) (Nuclear factor IV)                                                                                                                                                            | 732  |

|          |        |                                                                                                                                                                                                                                                  |      |
|----------|--------|--------------------------------------------------------------------------------------------------------------------------------------------------------------------------------------------------------------------------------------------------|------|
|          |        | (Thyroid-lupus autoantigen) (TLAA) (X-ray repair complementing defective repair in Chinese hamster cells 5 (double-strand-break rejoining))                                                                                                      |      |
| IID00145 | P17096 | High mobility group protein HMG-I/HMG-Y (HMG-I(Y)) (High mobility group AT-hook protein 1) (High mobility group protein A1) (High mobility group protein R)                                                                                      | 107  |
| IID00121 | P22415 | Upstream stimulatory factor 1 (Class B basic helix-loop-helix protein 11) (bHLHb11) (Major late transcription factor 1)                                                                                                                          | 310  |
| IID00196 | P23025 | DNA repair protein complementing XP-A cells (Xeroderma pigmentosum group A-complementing protein)                                                                                                                                                | 273  |
| IID00126 | P24928 | DNA-directed RNA polymerase II subunit RPB1 (RNA polymerase II subunit B1) (EC 2.7.7.6) (DNA-directed RNA polymerase II subunit A) (DNA-directed RNA polymerase III largest subunit) (RNA-directed RNA polymerase II subunit RPB1) (EC 2.7.7.48) | 1970 |
| IID00035 | P25054 | Adenomatous polyposis coli protein (Protein APC) (Deleted in polyposis 2.5)                                                                                                                                                                      | 2843 |
| IID00148 | P28324 | ETS domain-containing protein Elk-4 (Serum response factor accessory protein 1) (SAP-1) (SRF accessory protein 1)                                                                                                                                | 431  |
| IID00130 | P28749 | Retinoblastoma-like protein 1 (107 kDa retinoblastoma-associated protein) (p107) (pRb1)                                                                                                                                                          | 1068 |
| IID00037 | P31751 | RAC-beta serine/threonine-protein kinase (EC 2.7.11.1) (Protein kinase Akt-2) (Protein kinase B beta) (PKB beta) (RAC-PK-beta)                                                                                                                   | 481  |
| IID00039 | P35222 | Catenin beta-1 (Beta-catenin)                                                                                                                                                                                                                    | 781  |
| IID00043 | P38936 | Cyclin-dependent kinase inhibitor 1 (CDK-interacting protein 1) (Melanoma differentiation-associated protein 6) (MDA-6) (p21)                                                                                                                    | 164  |
| IID00044 | P39748 | Flap endonuclease 1 (FEN-1) (EC 3.1.-.-) (DNase IV) (Flap structure-specific endonuclease 1) (Maturation factor 1) (MF1) (hFEN-1)                                                                                                                | 380  |
| IID00047 | P42226 | Signal transducer and activator of transcription 6 (IL-4 Stat)                                                                                                                                                                                   | 847  |
| IID00269 | P42768 | Wiskott-Aldrich syndrome protein (WASp)                                                                                                                                                                                                          | 502  |
| IID00049 | P46527 | Cyclin-dependent kinase inhibitor 1B (Cyclin-dependent kinase inhibitor p27) (p27Kip1)                                                                                                                                                           | 198  |
| IID00050 | P48552 | Nuclear receptor-interacting protein 1 (Nuclear factor RIP140) (Receptor-interacting protein 140)                                                                                                                                                | 1158 |
| IID00271 | P49137 | MAP kinase-activated protein kinase 2 (MAPK-activated protein kinase 2) (MAPKAP kinase 2) (MAPKAP-K2) (MAPKAPK-2) (MK-2) (MK2) (EC                                                                                                               | 400  |

|          |        |                                                                                                                                                                                            |      |
|----------|--------|--------------------------------------------------------------------------------------------------------------------------------------------------------------------------------------------|------|
|          |        | 2.7.11.1)                                                                                                                                                                                  |      |
| IID00151 | P49792 | E3 SUMO-protein ligase RanBP2 (EC 6.3.2.-) (358 kDa nucleoporin) (Nuclear pore complex protein Nup358) (Nucleoporin Nup358) (Ran-binding protein 2) (RanBP2) (p270)                        | 3224 |
| IID00052 | P49841 | Glycogen synthase kinase-3 beta (GSK-3 beta) (EC 2.7.11.26) (Serine/threonine-protein kinase GSK3B) (EC 2.7.11.1)                                                                          | 420  |
| IID00237 | P51587 | Breast cancer type 2 susceptibility protein (Fanconi anemia group D1 protein)                                                                                                              | 3418 |
| IID00152 | P52272 | Heterogeneous nuclear ribonucleoprotein M (hnRNP M)                                                                                                                                        | 730  |
| IID00153 | P52292 | Importin subunit alpha-1 (Karyopherin subunit alpha-2) (RAG cohort protein 1) (SRP1-alpha)                                                                                                 | 529  |
| IID00238 | P52298 | Nuclear cap-binding protein subunit 2 (20 kDa nuclear cap-binding protein) (Cell proliferation-inducing gene 55 protein) (NCBP 20 kDa subunit) (CBP20) (NCBP-interacting protein 1) (NIP1) | 156  |
| IID00273 | P52565 | Rho GDP-dissociation inhibitor 1 (Rho GDI 1) (Rho-GDI alpha)                                                                                                                               | 204  |
| IID00053 | P52630 | Signal transducer and activator of transcription 2 (p113)                                                                                                                                  | 851  |
| IID00122 | P52907 | F-actin-capping protein subunit alpha-1 (CapZ alpha-1)                                                                                                                                     | 286  |
| IID00200 | P53350 | Serine/threonine-protein kinase PLK1 (EC 2.7.11.21) (Polo-like kinase 1) (PLK-1) (Serine/threonine-protein kinase 13) (STPK13)                                                             | 603  |
| IID00154 | P54198 | Protein HIRA (TUP1-like enhancer of split protein 1)                                                                                                                                       | 1017 |
| IID00155 | P54274 | Telomeric repeat-binding factor 1 (NIMA-interacting protein 2) (TTAGGG repeat-binding factor 1) (Telomeric protein Pin2/TRF1)                                                              | 439  |
| IID00201 | P55072 | Transitional endoplasmic reticulum ATPase (TER ATPase) (EC 3.6.4.6) (15S Mg(2+)-ATPase p97 subunit) (Valosin-containing protein) (VCP)                                                     | 806  |
| IID00274 | P61586 | Transforming protein RhoA (Rho cDNA clone 12) (h12)                                                                                                                                        | 193  |
| IID00058 | P62805 | Histone H4                                                                                                                                                                                 | 103  |
| IID00162 | P62826 | GTP-binding nuclear protein Ran (Androgen receptor-associated protein 24) (GTPase Ran) (Ras-like protein TC4) (Ras-related nuclear protein)                                                | 216  |
| IID00062 | P68431 | Histone H3.1 (Histone H3/a) (Histone H3/b) (Histone H3/c) (Histone H3/d) (Histone H3/f) (Histone H3/h) (Histone H3/i) (Histone H3/j) (Histone H3/k) (Histone H3/l)                         | 136  |

|          |        |                                                                                                                                                                                                                                    |      |
|----------|--------|------------------------------------------------------------------------------------------------------------------------------------------------------------------------------------------------------------------------------------|------|
| IID00163 | Q00987 | E3 ubiquitin-protein ligase Mdm2 (EC 6.3.2.-) (Double minute 2 protein) (Hdm2) (Oncoprotein Mdm2) (p53-binding protein Mdm2)                                                                                                       | 491  |
| IID00064 | Q01094 | Transcription factor E2F1 (E2F-1) (PBR3) (Retinoblastoma-associated protein 1) (RBAP-1) (Retinoblastoma-binding protein 3) (RBBP-3) (pRB-binding protein E2F-1)                                                                    | 437  |
| IID00206 | Q01658 | Protein Dr1 (Down-regulator of transcription 1) (Negative cofactor 2-beta) (NC2-beta) (TATA-binding protein-associated phosphoprotein)                                                                                             | 176  |
| IID00066 | Q02156 | Protein kinase C epsilon type (EC 2.7.11.13) (nPKC-epsilon)                                                                                                                                                                        | 737  |
| IID00207 | Q04206 | Transcription factor p65 (Nuclear factor NF-kappa-B p65 subunit) (Nuclear factor of kappa light polypeptide gene enhancer in B-cells 3)                                                                                            | 551  |
| IID00209 | Q05086 | Ubiquitin-protein ligase E3A (EC 6.3.2.-) (E6AP ubiquitin-protein ligase) (Human papillomavirus E6-associated protein) (Oncogenic protein-associated protein E6-AP) (Renal carcinoma antigen NY-REN-54)                            | 875  |
| IID00165 | Q05195 | Max dimerization protein 1 (Max dimerizer 1) (Protein MAD)                                                                                                                                                                         | 221  |
| IID00276 | Q07912 | Activated CDC42 kinase 1 (ACK-1) (EC 2.7.10.2) (EC 2.7.11.1) (Tyrosine kinase non-receptor protein 2)                                                                                                                              | 1038 |
| IID00069 | Q08209 | Serine/threonine-protein phosphatase 2B catalytic subunit alpha isoform (EC 3.1.3.16) (CAM-PRP catalytic subunit) (Calmodulin-dependent calcineurin A subunit alpha isoform)                                                       | 521  |
| IID00167 | Q09161 | Nuclear cap-binding protein subunit 1 (80 kDa nuclear cap-binding protein) (CBP80) (NCBP 80 kDa subunit)                                                                                                                           | 790  |
| IID00169 | Q13127 | RE1-silencing transcription factor (Neural-restrictive silencer factor) (X2 box repressor)                                                                                                                                         | 1097 |
| IID00277 | Q13153 | Serine/threonine-protein kinase PAK 1 (EC 2.7.11.1) (Alpha-PAK) (p21-activated kinase 1) (PAK-1) (p65-PAK)                                                                                                                         | 545  |
| IID00170 | Q13541 | Eukaryotic translation initiation factor 4E-binding protein 1 (4E-BP1) (eIF4E-binding protein 1) (Phosphorylated heat- and acid-stable protein regulated by insulin 1) (PHAS-I)                                                    | 118  |
| IID00074 | Q13772 | Nuclear receptor coactivator 4 (NCoA-4) (Androgen receptor coactivator 70 kDa protein) (70 kDa AR-activator) (70 kDa androgen receptor coactivator) (Androgen receptor-associated protein of 70 kDa) (Ret-activating protein ELE1) | 614  |

|          |        |                                                                                                                                                                                                                                                                                                                                                                                                                                                                                                         |      |
|----------|--------|---------------------------------------------------------------------------------------------------------------------------------------------------------------------------------------------------------------------------------------------------------------------------------------------------------------------------------------------------------------------------------------------------------------------------------------------------------------------------------------------------------|------|
| IID00075 | Q14103 | Heterogeneous nuclear ribonucleoprotein D0 (hnRNP D0) (AU-rich element RNA-binding protein 1)                                                                                                                                                                                                                                                                                                                                                                                                           | 355  |
| IID00080 | Q15054 | DNA polymerase delta subunit 3 (DNA polymerase delta subunit p66)                                                                                                                                                                                                                                                                                                                                                                                                                                       | 466  |
| IID00172 | Q15208 | Serine/threonine-protein kinase 38 (EC 2.7.11.1) (NDR1 protein kinase) (Nuclear Dbf2-related kinase 1)                                                                                                                                                                                                                                                                                                                                                                                                  | 465  |
| IID00081 | Q15466 | Nuclear receptor subfamily 0 group B member 2 (Orphan nuclear receptor SHP) (Small heterodimer partner)                                                                                                                                                                                                                                                                                                                                                                                                 | 257  |
| IID00082 | Q15596 | Nuclear receptor coactivator 2 (NCoA-2) (Class E basic helix-loop-helix protein 75) (bHLHe75) (Transcriptional intermediary factor 2) (hTIF2)                                                                                                                                                                                                                                                                                                                                                           | 1464 |
| IID00173 | Q15648 | Mediator of RNA polymerase II transcription subunit 1 (Activator-recruited cofactor 205 kDa component) (ARC205) (Mediator complex subunit 1) (Peroxisome proliferator-activated receptor-binding protein) (PBP) (PPAR-binding protein) (Thyroid hormone receptor-associated protein complex 220 kDa component) (Trap220) (Thyroid receptor-interacting protein 2) (TR-interacting protein 2) (TRIP-2) (Vitamin D receptor-interacting protein complex component DRIP205) (p53 regulatory protein RB18A) | 1581 |
| IID00083 | Q15788 | Nuclear receptor coactivator 1 (NCoA-1) (EC 2.3.1.48) (Class E basic helix-loop-helix protein 74) (bHLHe74) (Protein Hin-2) (RIP160) (Renal carcinoma antigen NY-REN-52) (Steroid receptor coactivator 1) (SRC-1)                                                                                                                                                                                                                                                                                       | 1441 |
| IID00127 | Q15796 | Mothers against decapentaplegic homolog 2 (MAD homolog 2) (Mothers against DPP homolog 2) (JV18-1) (Mad-related protein 2) (hMAD-2) (SMAD family member 2) (SMAD 2) (Smad2) (hSMAD2)                                                                                                                                                                                                                                                                                                                    | 467  |
| IID00213 | Q16236 | Nuclear factor erythroid 2-related factor 2 (NF-E2-related factor 2) (NFE2-related factor 2) (HEBP1) (Nuclear factor, erythroid derived 2, like 2)                                                                                                                                                                                                                                                                                                                                                      | 605  |
| IID00175 | Q16633 | POU domain class 2-associating factor 1 (B-cell-specific coactivator OBF-1) (BOB-1) (OCA-B) (OCT-binding factor 1)                                                                                                                                                                                                                                                                                                                                                                                      | 256  |
| IID00085 | Q16665 | Hypoxia-inducible factor 1-alpha (HIF-1-alpha) (HIF1-alpha) (ARNT-interacting protein) (Basic-helix-loop-helix-PAS protein MOP1) (Class E basic helix-loop-helix protein 78) (bHLHe78) (Member of PAS protein 1) (PAS domain-containing protein 8)                                                                                                                                                                                                                                                      | 826  |
| IID00216 | Q6VMQ6 | Activating transcription factor 7-interacting protein 1                                                                                                                                                                                                                                                                                                                                                                                                                                                 | 1270 |

|          |        |                                                                                                                                                                                |      |
|----------|--------|--------------------------------------------------------------------------------------------------------------------------------------------------------------------------------|------|
|          |        | (ATF-interacting protein) (ATF-IP) (ATF7-interacting protein) (ATFa-associated modulator) (hAM) (MBD1-containing chromatin-associated factor 1) (P621)                         |      |
| IID00282 | Q86U70 | LIM domain-binding protein 1 (LDB-1) (Carboxyl-terminal LIM domain-binding protein 2) (CLIM-2) (LIM domain-binding factor CLIM2) (hLdb1) (Nuclear LIM interactor)              | 411  |
| IID00220 | Q92585 | Mastermind-like protein 1 (Mam-1)                                                                                                                                              | 1016 |
| IID00092 | Q92793 | CREB-binding protein (EC 2.3.1.48)                                                                                                                                             | 2442 |
| IID00093 | Q92837 | Proto-oncogene FRAT1 (Frequently rearranged in advanced T-cell lymphomas 1) (FRAT-1)                                                                                           | 279  |
| IID00177 | Q96IZ0 | PRKC apoptosis WT1 regulator protein (Prostate apoptosis response 4 protein) (Par-4)                                                                                           | 340  |
| IID00222 | Q99081 | Transcription factor 12 (TCF-12) (Class B basic helix-loop-helix protein 20) (bHLHb20) (DNA-binding protein HTF4) (E-box-binding protein) (Transcription factor HTF-4)         | 682  |
| IID00179 | Q99967 | Cbp/p300-interacting transactivator 2 (MSG-related protein 1) (MRG-1) (P35srj)                                                                                                 | 270  |
| IID00252 | Q9HAU5 | Regulator of nonsense transcripts 2 (Nonsense mRNA reducing factor 2) (Up-frameshift suppressor 2 homolog) (hUpf2)                                                             | 1272 |
| IID00125 | Q9HB71 | Calcyclin-binding protein (CacyBP) (hCacyBP) (S100A6-binding protein) (Siah-interacting protein)                                                                               | 228  |
| IID00253 | Q9HD42 | Charged multivesicular body protein 1a (Chromatin-modifying protein 1a) (CHMP1a) (Vacuolar protein sorting-associated protein 46-1) (Vps46-1) (hVps46-1)                       | 196  |
| IID00100 | Q9NQB0 | Transcription factor 7-like 2 (HMG box transcription factor 4) (T-cell-specific transcription factor 4) (T-cell factor 4) (TCF-4) (hTCF-4)                                     | 619  |
| IID00102 | Q9NSA3 | Beta-catenin-interacting protein 1 (Inhibitor of beta-catenin and Tcf-4)                                                                                                       | 81   |
| IID00103 | Q9UBK2 | Peroxisome proliferator-activated receptor gamma coactivator 1-alpha (PGC-1-alpha) (PPAR-gamma coactivator 1-alpha) (PPARGC-1-alpha) (Ligand effect modulator 6)               | 798  |
| IID00104 | Q9UBT2 | SUMO-activating enzyme subunit 2 (EC 6.3.2.-) (Anthracycline-associated resistance ARX) (Ubiquitin-like 1-activating enzyme E1B) (Ubiquitin-like modifier-activating enzyme 2) | 640  |
| IID00105 | Q9UBT6 | DNA polymerase kappa (EC 2.7.7.7) (DINB protein) (DINP)                                                                                                                        | 870  |
| IID00225 | Q9UBU9 | Nuclear RNA export factor 1 (Tip-associated protein)                                                                                                                           | 619  |

|          |        |                                                                                                                                                                                                                                                       |      |
|----------|--------|-------------------------------------------------------------------------------------------------------------------------------------------------------------------------------------------------------------------------------------------------------|------|
|          |        | (Tip-associating protein) (mRNA export factor TAP)                                                                                                                                                                                                    |      |
| IID00226 | Q9UKV5 | E3 ubiquitin-protein ligase AMFR (EC 6.3.2.-)<br>(Autocrine motility factor receptor) (AMF receptor)<br>(RING finger protein 45) (gp78)                                                                                                               | 643  |
| IID00230 | Q9Y3E7 | Charged multivesicular body protein 3 (Chromatin-modifying protein 3) (Neuroendocrine differentiation factor) (Vacuolar protein sorting-associated protein 24) (hVps24)                                                                               | 222  |
| IID00117 | Q9Y5B0 | RNA polymerase II subunit A C-terminal domain phosphatase (EC 3.1.3.16) (TFIIF-associating CTD phosphatase)                                                                                                                                           | 961  |
| IID00109 | Q9Y618 | Nuclear receptor corepressor 2 (N-CoR2) (CTG repeat protein 26) (SMAP270) (Silencing mediator of retinoic acid and thyroid hormone receptor) (SMRT) (T3 receptor-associating factor) (TRAC) (Thyroid-, retinoic-acid-receptor-associated corepressor) | 2525 |

<sup>1</sup> Protein identification number in IDEAL database.

<sup>2</sup> protein identification number in UniProt database.

<sup>3</sup> Protein name given in IDEAL database.

<sup>4</sup> Total length of each protein given in IDEAL database.
